# Supplementary material
Source: PubMed Central journal article supplement (PMC9061807)
Supplement: 41422_2022_631_MOESM1_ESM.pdf [file 41422_2022_631_MOESM1_ESM.pdf]

1 **Supplementary Material**

2 **A Pan-sarbecovirus Vaccine Induces Highly Potent and Durable Neutralizing**  
3 **Antibody Responses in Non-human Primates against SARS-CoV-2 Omicron**  
4 **Variant**

5  
6 Zezhong Liu<sup>1,8</sup>, Jasper Fuk-Woo Chan<sup>2,3,4,8</sup>, Jie Zhou<sup>1,8</sup>, Meiyu Wang<sup>5,6,8</sup>, Qian  
7 Wang<sup>1</sup>, Guangxu Zhang<sup>1</sup>, Wei Xu<sup>1</sup>, Kenn Ka-Heng Chik<sup>4</sup>, Yilong Zhang<sup>7</sup>, Youchun  
8 Wang<sup>5,6†</sup>, Kwok-Yung Yuen<sup>2,3,4†</sup>, Lu Lu<sup>1†</sup>, Shibo Jiang<sup>1†</sup>

9  
10 **Affiliations:**

11 <sup>1</sup>Key Laboratory of Medical Molecular Virology (MOE/NHC/CAMS), School of Basic  
12 Medical Sciences, Shanghai Frontiers Science Center of Pathogenic Microbes and  
13 Infection, Shanghai Institute of Infectious Disease and Biosecurity, Fudan University,  
14 Shanghai, China.

15 <sup>2</sup>State Key Laboratory of Emerging Infectious Diseases, Carol Yu Centre for Infection,  
16 Department of Microbiology, Li Ka Shing Faculty of Medicine, The University of Hong  
17 Kong, Pokfulam, Hong Kong Special Administrative Region, China.

18 <sup>3</sup>Department of Clinical Microbiology and Infection Control, The University of Hong  
19 Kong-Shenzhen Hospital, Shenzhen, Guangdong, China.

20 <sup>4</sup>Centre for Virology, Vaccinology and Therapeutics, Hong Kong Science and  
21 Technology Park, Hong Kong Special Administrative Region, China.

22 <sup>5</sup>Graduate School of Peking Union Medical College, No. 9 Dongdan Santiao,  
23 Dongcheng District, Beijing, China.

24 <sup>6</sup>Division of HIV/AIDS and Sex-transmitted Virus Vaccines, Institute for Biological  
25 Product Control, National Institutes for Food and Drug Control (NIFDC), No. 31  
26 Huatuo Street, Daxing District, Beijing, China.

27 <sup>7</sup>Fulgent Pharma LLC., 4978 Santa Anita Avenue, Temple City, CA, USA.

28 <sup>8</sup> These authors contributed equally: Zezhong Liu, Jasper Fuk-Woo Chan, Jie Zhou,  
29 Meiyu Wang

30 †Corresponding author. Email: [shibojiang@fudan.edu.cn](mailto:shibojiang@fudan.edu.cn) (S.J.); [lul@fudan.edu.cn](mailto:lul@fudan.edu.cn)  
31 (L.L.); [kyyuen@hku.hk](mailto:kyyuen@hku.hk) (K.-Y.Y.); [wangyc@nifdc.org.cn](mailto:wangyc@nifdc.org.cn) (Y.W.)

32

33

34

## 35 **Methods:**

### 36 **Cells**

37 HEK293T cells and Huh-7 cells were obtained from the American Type Culture  
38 Collection (ATCC). VeroE6-TMPRSS2 cells were maintained in our laboratories.  
39 Dulbecco's Modified Eagle's Medium (DMEM) (Meilun, China) supplemented with  
40 10% fetal bovine serum (FBS) was used to culture the HEK293T, Huh-7 and VeroE6-  
41 TMPRSS2 cells.

### 42 **Animals**

43 Rhesus macaques with good health were purchased from the Beijing Institute of  
44 Xieerxin Biology Resource and these macaques did not conduct any other experiment  
45 before. All animal experiments were conducted at Beijing Institute of Xieerxin Biology  
46 Resource and approved by the Institutional Animal Care and Use Committee  
47 (E20201101).

### 48 **Immunization**

49 Six rhesus macaques were randomly assigned to two groups and each group contain  
50 3 macaques. The first group of macaques was intramuscularly immunized with 100 µg  
51 RBD-Fc formulated with 400 µg CF501 at days 0, 21 and 115. The second group of  
52 macaques was intramuscularly immunized with 100 µg RBD-Fc formulated with an  
53 equal volume of Imject Alum adjuvant (Thermo Scientific, USA) at days 0, 21 and 115.

54 The sera were collected on days 28, 51, 64, 78, 100, 113, 122, 136, 150, 178, 191  
55 respectively.

## 56 **ELISA**

57 Enzyme-linked immunosorbent assay (ELISA) was used to test the SARS-CoV-2  
58 wildtype (WA1)- or Omicron-specific IgG endpoint titer as previously described with  
59 minor modification.<sup>1</sup> Briefly, the ELISA plates were coated with 1 µg/ml Omicron  
60 RBD-His protein (Kactus Biosystems) at 4 °C overnight. After blocking with the  
61 blocking buffer (PBS contains 5% BSA), the plates were incubated with the serially  
62 diluted pooled sera from the immunized macaques at 37°C for 45 min. And then, the  
63 HRP-conjugated goat anti-monkey IgG (Abcam, UK) was added and incubated at 37 °C  
64 for another 45 min. Finally, 3,3',5,5'-tetramethylbenzidine (TMB) was used to show  
65 the reaction and the H<sub>2</sub>SO<sub>4</sub> was used to stop the reaction. A microplate reader (Infinite  
66 M200PRO, Switzerland) was used to read the absorbance at 450 nm (A450). The  
67 endpoint titer was considered as the highest serum dilution exhibiting their A450>2.1-  
68 fold of background values.

## 69 **Production of the pseudovirus**

70 PsVs of SARS-CoV-2 WA1 strain, Omicron variant and Mu variants were  
71 produced as previously described.<sup>1-3</sup> For the production of the HIV backbone PsV,  
72 HEK293T cells were co-transfected with the plasmids of pNL4-3.Luc.R-E- and  
73 PcDNA3.1-SARS-CoV-2 WA1/Omicron/Mu-S. After 60 h incubation, the supernatants  
74 were collected and used for the serum neutralization assay. For the production of the  
75 VSV backbone PsV, HEK293T cells were transfected with the plasmid carrying the  
76 SARS-CoV-2 WA1/Omicron spike. After that, the cells were transfected with the G\*  
77 ΔG-VSV (VSV G pseudotyped virus). The supernatant was collected at 24 h post the  
78 infection and used for the serum neutralization assay.

## 79 **Pseudovirus neutralization assay**

80 The serum neutralization assay using pseudovirus was conducted as previously  
81 described.<sup>1,3</sup> Briefly,  $1 \times 10^4$  cells/well were seeded into the 96-well plates. After 8 h,

82 the serially diluted sera from the immunized macaques were pre-incubated with the  
83 Omicron/WA1 PsV at 37°C for 30 min. After that, the mixture was added into the Huh-  
84 7 cells and incubated for 12 h. The cell supernatants were replaced with the fresh  
85 DMEM and furtherly incubated at 37°C for 48 h. Finally, a Firefly Luciferase Assay  
86 Kit (Promega, USA) was used to detect the luciferase activity. NT<sub>50</sub> was defined as the  
87 dilution of the antiserum that reduces the relative luminescence units by 50%, compared  
88 with the relative luminescence units in the virus control wells containing no antiserum.

### 89 **Authentic virus neutralization assay**

90 The authentic Omicron (hCoV-19/Hong Kong/HKU-344/2021; GISAID accession  
91 number EPI\_ISL\_7357684) was isolated from the respiratory tract specimens of a  
92 COVID-19 patient in Hong Kong.<sup>4</sup> Vero-E6-TMPRSS2 cells were used as the target  
93 cells to evaluate the serum neutralization activity against the SARS-CoV-2 HKU-001a  
94 (GenBank accession number MT230904) and Omicron infection. Briefly, the 1 × 10<sup>4</sup>  
95 cells/well Vero-E6-TMPRSS2 cells were seeded in a 96 well-plate overnight at 37 °C.  
96 After 12 h, the pooled sera from the immunized macaques were diluted into indicated  
97 concentrations. And then the diluted sera were incubated with 0.01 MOI of SARS-CoV-  
98 2 HKU-001a or Omicron variant at 37 °C for 1 h. Afterward, the mixture of serum and  
99 virus was overlaid onto the Vero-E6-TMPRSS2 cells and further incubated at 37 °C for  
100 approximately 48 h. Finally, cytopathic effect (CPE) was observed for all wells. The  
101 CPE was scored as either positive (0% inhibition) or negative (100% inhibition) in a  
102 blinded manner as previously described.<sup>4</sup> The NT<sub>50</sub> was defined as the dilution of the  
103 antiserum that reduces CPE by 50%, compared with the CPE in virus control wells  
104 containing no antiserum. GraphPad Prism was used for calculating the NT<sub>50</sub> value.

105

### 106 **REFERENCES**

- 107 1. Liu, Z., et al. *Signal Transduct Target Ther* **5**, 282 (2020).
- 108 2. Liu, Z., et al. *Protein Cell* **23**, 1-21 (2021).
- 109 3. Xia, S., et al. *Cell Res* **30**, 343-355 (2020).
- 110 4. Lu, L., et al. *Clin Infect Dis* **16**, ciab1041 (2021).

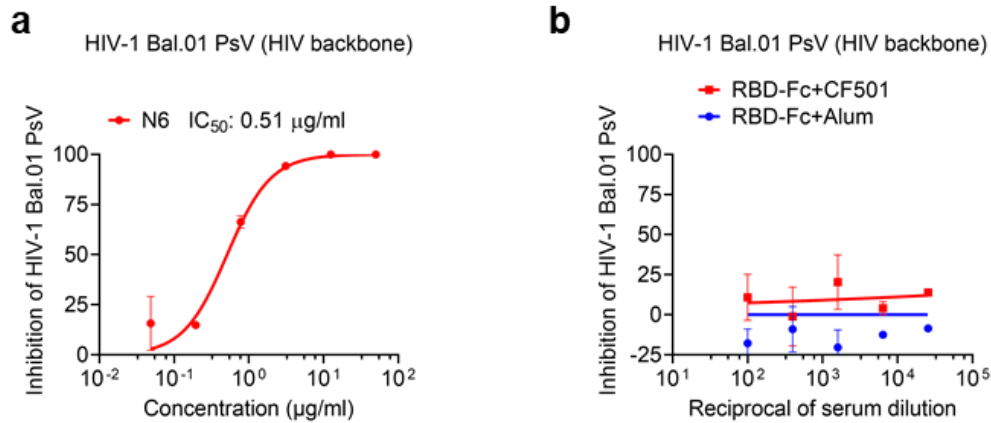

111

112 **Supplementary Fig. S1. The neutralizing activity of HIV-1 neutralizing mAb N6**  
 113 **and the sera from the immunized macaques against HIV-1 Bal.01 PsV.**

114 a Dose-dependent curve of N6 against the infection of HIV-1 Bal.01 PsV. Data are  
 115 mean±SD.

116 b The neutralizing activity against HIV-1 Bal.01 PsV for the sera from CF501/RBD-  
 117 Fc and Alum/RBD-Fc group. Data are mean±SD.

118

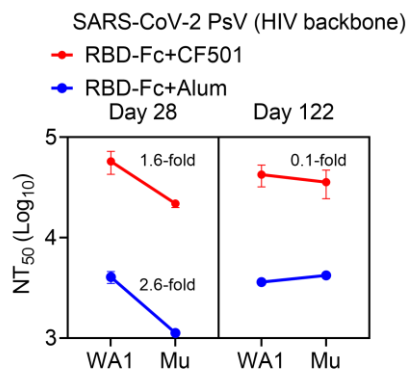

119

120 **Supplementary Fig. S2. Fold reduction of the NT<sub>50</sub> in the pooled sera from the**  
 121 **immunized macaques against Mu PsV compared to the SARS-CoV-2 WA1 PsV at days**  
 122 **28 and 122. Data are mean ± SD.**

123

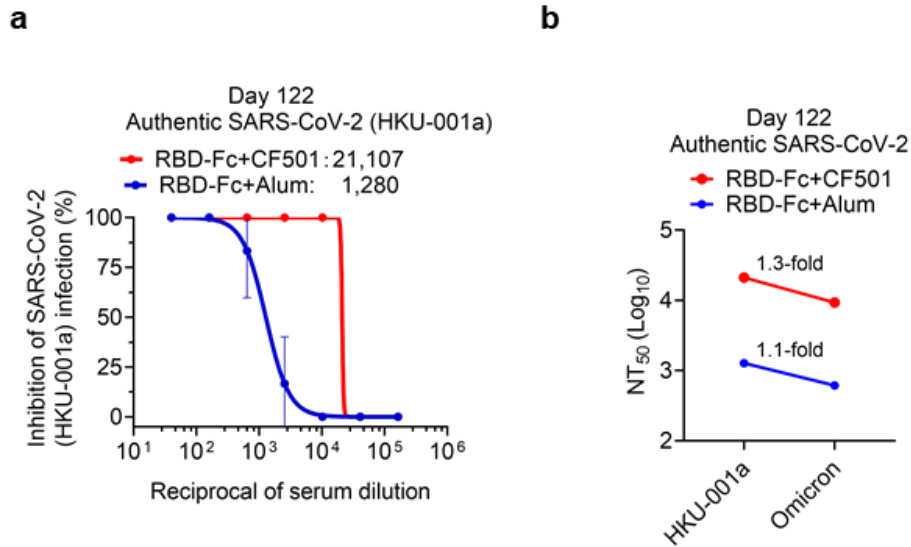

124

125 **Supplementary Fig. S3. Comparison of the nAb titer of the pooled sera against the**  
 126 **authentic SARS-CoV-2 (HKU-001a) and Omicron.**

127 **a** Titers of nAbs in the pooled sera at day 122 in the CF501/RBD-Fc and Alum/RBD-  
 128 Fc groups against authentic SARS-CoV-2 (HKU-001a). Data are mean  $\pm$  SD.

129 **b** Fold reduction of nAb titer against authentic Omicron in the pooled sera from the  
 130 immunized macaques at day 122, compared to the titer against authentic SARS-CoV-2  
 131 (HKU-001a).
